# Supplementary material for: Whole-Body Vibration Exercise for Knee Osteoarthritis: A Systematic Review and Meta-Analysis
Source: Evid Based Complement Alternat Med. 2015 Aug 5;2015:758147. doi: 10.1155/2015/758147 (PMC4540999; doi:10.1155/2015/758147)
Supplement: Supplementary file 1 — Appendix S1: The judging criteria of Grading of Recommendations Assessment, Development and Evaluation (GRADE) system. Supplementary fileS1: Search strategies for all databases. ChecklistS1 PRISMA 2009: Checklist for this meta-analysis. [file 758147.f1.zip]

Archive with 3 entries (3 files):
- (Appendix S1) The judging criteria of the GRADE.doc
- (Supplementary file S1) Search strategy.doc
- (ChecklistS1) PRISMA 2009 Checklist.doc
